# Supplementary material
Source: ML conference proceedings conference paper supplement (https://openreview.net/forum?id=c4XZpv5Fdh)
Supplement: supplementary_material [file attachment]

## Sheet: TextPrompt
No.	Modalities	Type	Question Template	Declarative Sentence Text Prompt
1	Audio-Visual	Existential	Is this sound from the instrument in the video?	The sound is not from the instrument in the video.
2	Audio-Visual	Existential	Is the <Object> in the video always playing?	The <Object> is not playing in the video.
3	Audio-Visual	Existential	Is there a voiceover?	There are sounds other than musical instruments in the video.
4	Audio-Visual	Counting	How many instruments are sounding in the video?	There are musical instruments playing in the video.
5	Audio-Visual	Counting	How many types of musical instruments sound in the video?	There are musical instruments playing in the video.
6	Audio-Visual	Counting	How many instruments in the video did not sound from beginning to end?	The instrument is not playing in the video.
7	Audio-Visual	Counting	How many sounding <Object> in the video?	The <Object> is playing in the video.
8	Audio-Visual	Location	Where is the <LL> instrument?	The sounds of musical instruments in the video are different.
9	Audio-Visual	Location	Is the <FL> sound coming from the <LR> instrument?	The instruments in the video are not sounding simultaneously.
10	Audio-Visual	Location	Which is the musical instrument that sounds at the same time as the <Object>?	The <Object> is playing in the video.
11	Audio-Visual	Location	What is the <LR> instrument of the <FL> sounding instrument?	There are musical instruments on the <LR> that are not being played.
12	Audio-Visual	Comparative	Is the instrument on the <LR> more rhythmic than the instrument on the <LR>?	Inconsistent rhythmic sense of instrumental performance in the video.
13	Audio-Visual	Comparative	Is the instrument on the <LR> louder than the instrument on the <LR>?	The sounds of musical instruments in the video are different.
14	Audio-Visual	Comparative	Is the <Object> on the <LR> more rhythmic than the <Object> on the <LR>?	The <Object> on the <LR1> plays a different rhythm than the <Object2> on the <LR2>.
15	Audio-Visual	Comparative	Is the <Object> on the <LR> louder than the <Object> on the <LR>?	The <Object> on the <LR> and the <Object> on the <LR> produce different volumes of sound.
16	Audio-Visual	Temporal	Where is the <FL> sounding instrument?	The instruments in the video do not sound simultaneously.
17	Audio-Visual	Temporal	Which <Object> makes the sound <FL>?	The <Object> in the video are not sounding at the same time.
18	Audio-Visual	Temporal	What is the <TH> instrument that comes in?	There are musical instruments playing in the video
19	Audio-Visual	Temporal	Which instrument makes sounds <BA> the <Object>?	The <Object> is playing in the video.
20	Visual	Counting	Is there a <Object> in the entire video?	The <Object> is in this video.
21	Visual	Counting	Are there <Object> and <Object> instruments in the video?	There are instruments other than <Object> or <Object> in this video.
22	Visual	Counting	How many types of musical instruments appeared in the entire video?	There are musical instruments playing in the video.
23	Visual	Counting	How many <Object> are in the entire video?	The <Object> is in this video.
24	Visual	Location	Where is the performance?	There are musical instruments playing in the video.
25	Visual	Location	What is the instrument on the <LR> of <Object>?	There is a musical instrument on the <LR> side of the <Object>.
26	Visual	Location	What kind of musical instrument is it?	There are musical instruments playing in the video.
27	Visual	Location	What kind of instrument is the <LRer> instrument?	There are musical instruments playing in the video.
28	Audio	Counting	Is there a <Object> sound?	There are sounds of instruments other than the <Object> in the video.
29	Audio	Counting	Are there <Object> and <Object> sound?	There are sounds of instruments other than the <Object> or the <Object> in the video.
30	Audio	Counting	How many musical instruments were heard throughout the video?	There are musical instruments playing in the video.
31	Audio	Comparative	Is the <Object> more rhythmic than the <Object>?	The <Object> and <Object> have different rhythms in the video.
32	Audio	Comparative	Is the <Object> louder than the <Object>?	The <Object> and <Object> have different sounds in the video.
33	Audio	Comparative	Is the <Object> playing longer than the <Object>?	The <Object> and <Object> are not played at the same time in the video.
